# Supplementary material for: Endothelial cell‐derived angiopoietin‐2 is a therapeutic target in treatment‐naive and bevacizumab‐resistant glioblastoma
Source: EMBO Mol Med. 2015 Dec 14;8(1):39–57. doi: 10.15252/emmm.201505505 (PMC4718155; doi:10.15252/emmm.201505505)
Supplement: Supplementary file 1 — Appendix [file EMMM-8-39-s001.pdf]

**Endothelial cell-derived Angiopoietin-2 is a therapeutic target in treatment-naive and Bevacizumab-resistant glioblastoma, A. Scholz et al., Appendix**

**Table of contents:**

Appendix Table S1

Appendix Table S2

**Appendix Table S1: Clinical data of the GBM matched biopsy cohort**

| <b>Patient ID</b> | <b>Age at diagnosis (years)</b> | <b>Sex</b> | <b>MGMT status</b> | <b>Bev treatment (days)</b> | <b>Last Bev therapy prior to histology (days)</b> |
|-------------------|---------------------------------|------------|--------------------|-----------------------------|---------------------------------------------------|
| 1                 | 51                              | m          | U                  | 91                          | 179                                               |
| 2                 | 30                              | m          | U                  | 407                         | 204                                               |
| 3                 | 52                              | m          | U                  | 84                          | 35                                                |
| 4                 | 41                              | f          | U                  | 166                         | 113                                               |
| 5                 | 56                              | m          | n.a.               | 288                         | 45                                                |
| 6                 | 47                              | m          | U                  | 214                         | 133                                               |
| 7                 | 39                              | m          | M                  | 42                          | 21                                                |
| 8                 | 41                              | m          | n.a.               | 528                         | 23                                                |
| 9                 | 32                              | m          | M                  | 154                         | 53                                                |
| 10                | 63                              | m          | U                  | 336                         | 64                                                |
| 11                | 72                              | f          | U                  | 392                         | 37                                                |
| 12                | 70                              | f          | U                  | 258                         | 34                                                |
| 13                | 63                              | f          | U                  | 280                         | 33                                                |
| 14                | 46                              | f          | U                  | 170                         | 96                                                |
| 15                | 62                              | f          | U                  | 210                         | 14                                                |
| 16                | 43                              | m          | U                  | 140                         | 31                                                |
| 17                | 45                              | f          | U                  | 281                         | 34                                                |
| 18                | 49                              | m          | n.a.               | 84                          | 32                                                |
| 19                | 65                              | m          | n.a.               | 62                          | 36                                                |
| 20                | 66                              | f          | M                  | 293                         | 56                                                |
| 21                | 55                              | m          | U                  | n.a.                        | 150                                               |
| 22                | 51                              | m          | U                  | 90                          | 30                                                |
| 24                | 65                              | m          | U                  | 180                         | 267                                               |
| 25                | 53                              | m          | n.a.               | 114                         | 27                                                |
| 26                | 41                              | m          | U                  | 217                         | 23                                                |
| 27                | 49                              | m          | M                  | 160                         | 16                                                |
| 28                | 59                              | m          | U                  | n.a.                        | 104                                               |
| 29                | 55                              | f          | M                  | 326                         | 40                                                |
| 30                | 62                              | m          | M                  | 117                         | 23                                                |

M = male, f = female, n.a = not available, MGMT = O6-Methylguanine-DNA-Methyltransferase, U = unmethylated, M = methylated, Bev = Bevacizumab

**Appendix Table S2: P values Figures, Expanded View Figures**

|                                                     | P value  |  |
|-----------------------------------------------------|----------|--|
| <b>Figure 1 D</b>                                   |          |  |
| Kruskal-Wallis (Dunn's post test)                   |          |  |
| Normal brain vs. Diffuse low grade glioma           | > 0,9999 |  |
| Normal brain vs. Anaplastic astrocytoma             | 0,1497   |  |
| Normal brain vs. Glioblastoma                       | 0,0006   |  |
| Diffuse low grade glioma vs. Anaplastic astrocytoma | 0,582    |  |
| Diffuse low grade glioma vs. Glioblastoma           | < 0,0001 |  |
| Anaplastic astrocytoma vs. Glioblastoma             | 0,0519   |  |
|                                                     |          |  |
| <b>Figure 2 B (CD31)</b>                            |          |  |
| Unpaired t test                                     |          |  |
| P value                                             | 0,0277   |  |
|                                                     |          |  |
| <b>Figure 2 B (Desmin)</b>                          |          |  |
| Unpaired t test                                     |          |  |
| P value                                             | 0,0425   |  |
|                                                     |          |  |
| <b>Figure 2 D</b>                                   |          |  |
| Unpaired t test                                     |          |  |
| P value                                             | 0,0091   |  |
|                                                     |          |  |
| <b>Figure 2 F</b>                                   |          |  |
| Unpaired t test                                     |          |  |
| P value                                             | 0,0017   |  |
|                                                     |          |  |
| <b>Figure 3 B (Iba1)</b>                            |          |  |
| Kruskal-Wallis (Dunn's post test)                   |          |  |
| normal brain vs. low grade Glioma                   | 0,8432   |  |
| normal brain vs. anaplastic Astrocytoma             | 0,0958   |  |
| normal brain vs. Glioblastoma                       | 0,0008   |  |
| low grade Glioma vs. anaplastic Astrocytoma         | > 0,9999 |  |

|                                             |          |  |
|---------------------------------------------|----------|--|
| low grade Glioma vs. Glioblastoma           | 0,0179   |  |
| anaplastic Astrocytoma vs. Glioblastoma     | > 0,9999 |  |
|                                             |          |  |
| <b>Figure 3 B (CD15)</b>                    |          |  |
| Kruskal-Wallis (Dunn's post test)           |          |  |
| normal brain vs. low grade Glioma           | 0,5997   |  |
| normal brain vs. anaplastic Astrocytoma     | 0,0341   |  |
| normal brain vs. Glioblastoma               | < 0,0001 |  |
| low grade Glioma vs. anaplastic Astrocytoma | 0,7896   |  |
| low grade Glioma vs. Glioblastoma           | 0,005    |  |
| anaplastic Astrocytoma vs. Glioblastoma     | 0,7476   |  |
|                                             |          |  |
| <b>Figure 3 B (CD3)</b>                     |          |  |
| Kruskal-Wallis (Dunn's post test)           |          |  |
| normal brain vs. low grade Glioma           | > 0,9999 |  |
| normal brain vs. anaplastic Astrocytoma     | 0,2333   |  |
| normal brain vs. Glioblastoma               | 0,0109   |  |
| low grade Glioma vs. anaplastic Astrocytoma | 0,1487   |  |
| low grade Glioma vs. Glioblastoma           | 0,0006   |  |
| anaplastic Astrocytoma vs. Glioblastoma     | > 0,9999 |  |
|                                             |          |  |
| <b>Figure 4 B (CD31)</b>                    |          |  |
| Kruskal-Wallis (Dunn's post test)           |          |  |
| Control vs. AMG386                          | 0,4935   |  |
| Control vs. Aflibercept                     | 0,3661   |  |
| Control vs. Aflibercept + AMG386            | < 0,0001 |  |
| AMG386 vs. Aflibercept                      | > 0,9999 |  |
| AMG386 vs. Aflibercept + AMG386             | 0,0213   |  |
| Aflibercept vs. Aflibercept + AMG386        | 0,0141   |  |
|                                             |          |  |
| <b>Figure 4 B (Desmin)</b>                  |          |  |
| Kruskal-Wallis (Dunn's post test)           |          |  |
| Control vs. AMG386                          | 0,0013   |  |
| Control vs. Aflibercept                     | < 0,0001 |  |

|                                    |          |  |
|------------------------------------|----------|--|
| Control vs. Afibercept + AMG386    | 0,0432   |  |
| AMG386 vs. Afibercept              | > 0,9999 |  |
| AMG386 vs. Afibercept + AMG386     | > 0,9999 |  |
| Afibercept vs. Afibercept + AMG386 | 0,6722   |  |
|                                    |          |  |
| <b>Figure 4 D</b>                  |          |  |
| one-way ANOVA (Tukey's post test)  |          |  |
| Control vs. AMG386                 | 0,2356   |  |
| Control vs. Afibercept             | 0,0068   |  |
| Control vs. Afibercept + AMG386    | 0,034    |  |
| AMG386 vs. Afibercept              | 0,116    |  |
| AMG386 vs. Afibercept + AMG386     | 0,5378   |  |
| Afibercept vs. Afibercept + AMG386 | 0,6353   |  |
|                                    |          |  |
| <b>Figure 4 E</b>                  |          |  |
| one-way ANOVA (Tukey's post test)  |          |  |
| Control vs. AMG386                 | 0,5994   |  |
| Control vs. Afibercept             | 0,047    |  |
| Control vs. Afibercept + AMG386    | 0,0017   |  |
| AMG386 vs. Afibercept              | 0,4422   |  |
| AMG386 vs. Afibercept + AMG386     | 0,0245   |  |
| Afibercept vs. Afibercept + AMG386 | 0,2332   |  |
|                                    |          |  |
| <b>Figure 4 H (F4/80)</b>          |          |  |
| one-way ANOVA (Tukey's post test)  |          |  |
| control vs. AMG386                 | < 0,0001 |  |
| control vs. Zaltrap                | < 0,0001 |  |
| control vs. AMG386 + Zaltrap       | < 0,0001 |  |
| AMG386 vs. Zaltrap                 | 0,9915   |  |
| AMG386 vs. AMG386 + Zaltrap        | 0,6402   |  |
| Zaltrap vs. AMG386 + Zaltrap       | 0,8217   |  |
|                                    |          |  |
| <b>Figure 4 H (CD3)</b>            |          |  |
| one-way ANOVA (Tukey's post test)  |          |  |

|                                      |          |          |
|--------------------------------------|----------|----------|
| control vs. AMG386                   | 0,1972   |          |
| control vs. Zaltrap                  | < 0,0001 |          |
| control vs. AMG386 + Zaltrap         | 0,3494   |          |
| AMG386 vs. Zaltrap                   | 0,065    |          |
| AMG386 vs. AMG386 + Zaltrap          | 0,9995   |          |
| Zaltrap vs. AMG386 + Zaltrap         | 0,213    |          |
|                                      |          |          |
| <b>Figure 4 H (Ly6G)</b>             |          |          |
| one-way ANOVA (Tukey's post test)    |          |          |
| control vs. AMG386                   | 0,6334   |          |
| control vs. Vasculotide + Zaltrap    | 0,916    |          |
| control vs. Zaltrap                  | 0,1256   |          |
| AMG386 vs. Vasculotide + Zaltrap     | 0,3997   |          |
| AMG386 vs. Zaltrap                   | 0,0257   |          |
| Vasculotide + Zaltrap vs. Zaltrap    | 0,5399   |          |
|                                      |          |          |
| <b>Figure 4 I</b>                    |          |          |
|                                      | log-rank | wilcoxon |
| control vs AMG386                    | < 0,0001 | < 0.0001 |
| control vs aflibercept               | < 0,0001 | < 0,0001 |
| control vs AMG386+aflibercept        | < 0,0001 | < 0,0001 |
| aflibercept vs AMG386 + aflibercept  | < 0,0001 | < 0,0001 |
|                                      |          |          |
| <b>Figure 4 K (CD206)</b>            |          |          |
| one-way ANOVA (Tukey's post test)    |          |          |
| Control vs. AMG386                   | 0,0424   |          |
| Control vs. Aflibercept              | 0,4676   |          |
| Control vs. Aflibercept + AMG386     | 0,0751   |          |
| AMG386 vs. Aflibercept               | 0,8121   |          |
| AMG386 vs. Aflibercept + AMG386      | 0,9013   |          |
| Aflibercept vs. Aflibercept + AMG386 | 0,572    |          |
|                                      |          |          |
| <b>Figure 4 K (ratio)</b>            |          |          |
| one-way ANOVA (Tukey's post test)    |          |          |

|                                             |          |  |
|---------------------------------------------|----------|--|
| Control vs. AMG386                          | 0,0528   |  |
| Control vs. Aflibercept                     | < 0,0001 |  |
| Control vs. Aflibercept + AMG386            | < 0,0001 |  |
| AMG386 vs. Aflibercept                      | 0,1254   |  |
| AMG386 vs. Aflibercept + AMG386             | 0,0011   |  |
| Aflibercept vs. Aflibercept + AMG386        | 0,1251   |  |
|                                             |          |  |
| <b>Figure 4 L</b>                           |          |  |
| one-way ANOVA (Tukey's post test)           |          |  |
| Control vs. AMG386                          | 0,0146   |  |
| Control vs. Aflibercept                     | 0,1278   |  |
| Control vs. Aflibercept + AMG386            | 0,1872   |  |
| AMG386 vs. Aflibercept                      | 0,5303   |  |
| AMG386 vs. Aflibercept + AMG386             | 0,4028   |  |
| Aflibercept vs. Aflibercept + AMG386        | 0,9945   |  |
|                                             |          |  |
| <b>Figure 5 D</b>                           |          |  |
| Kruskal-Wallis (Dunn's post test)           |          |  |
| treatment-naïve GBM vs. S / RTx / CTx       | > 0,9999 |  |
| treatment-naïve GBM vs. S / RTx / CTx / Bev | 0,0296   |  |
| S / RTx / CTx vs. S / RTx / CTx / Bev       | 0,2799   |  |
|                                             |          |  |
| <b>Figure 5 G</b>                           |          |  |
| Kruskal-Wallis (Dunn's post test)           |          |  |
| treatment-naïve GBM vs. S / RTx / CTx       | > 0,9999 |  |
| treatment-naïve GBM vs. S / RTx / CTx / Bev | 0,0268   |  |
| S / RTx / CTx vs. S / RTx / CTx / Bev       | 0,6731   |  |
|                                             |          |  |
| <b>Figure 5 H</b>                           |          |  |
| Kruskal-Wallis (Dunn's post test)           |          |  |
| treatment-naïve GBM vs. S / RTx / CTx       | 0,0352   |  |
| treatment-naïve GBM vs. S / RTx / CTx / Bev | < 0,0001 |  |
| S / RTx / CTx vs. S / RTx / CTx / Bev       | > 0,9999 |  |
|                                             |          |  |

|                                             |          |  |
|---------------------------------------------|----------|--|
| <b>Figure 6 C</b>                           |          |  |
| Kruskal-Wallis (Dunn's post test)           |          |  |
| treatment-naive GBM vs. S / RTx / CTx       | 0,033    |  |
| treatment-naive GBM vs. S / RTx / CTx / Bev | < 0,0001 |  |
| S / RTx / CTx vs. S / RTx / CTx / Bev       | > 0,9999 |  |
|                                             |          |  |
| <b>Figure 6 E</b>                           |          |  |
| Kruskal-Wallis (Dunn's post test)           |          |  |
| treatment-naive GBM vs. S / RTx / CTx       | > 0,9999 |  |
| treatment-naive GBM vs. S / RTx / CTx / Bev | 0,0044   |  |
| S / RTx / CTx vs. S / RTx / CTx / Bev       | 0,3274   |  |
|                                             |          |  |
| <b>Figure 6 H</b>                           |          |  |
| Kruskal-Wallis (Dunn's post test)           |          |  |
| treatment-naive GBM vs. S / RTx / CTx       | > 0,9999 |  |
| treatment-naive GBM vs. S / RTx / CTx / Bev | < 0,0001 |  |
| S / RTx / CTx vs. S / RTx / CTx / Bev       | 0,1153   |  |
|                                             |          |  |
| <b>Expanded View Figure 1 C</b>             |          |  |
| Kruskal-Wallis (Dunn's post test)           |          |  |
| Low grade glioma vs. Anaplastic astrocytoma | > 0,9999 |  |
| Low grade glioma vs. Glioblastoma           | 0,0001   |  |
| Anaplastic astrocytoma vs. Glioblastoma     | < 0,0001 |  |
|                                             |          |  |
| <b>Expanded View Figure 1 D</b>             |          |  |
| Kruskal-Wallis (Dunn's post test)           |          |  |
| NAGM vs. NAWM                               | 0,2833   |  |
| NAGM vs. Infiltration zone                  | < 0,0001 |  |
| NAGM vs. Tumor center                       | < 0,0001 |  |
| NAWM vs. Infiltration zone                  | 0,8571   |  |
| NAWM vs. Tumor center                       | < 0,0001 |  |
| Infiltration zone vs. Tumor center          | 0,0004   |  |
|                                             |          |  |

|                                   |          |  |
|-----------------------------------|----------|--|
| <b>Expanded View Figure 3 B</b>   |          |  |
| 2-way ANOVA                       |          |  |
| day 5                             |          |  |
| Control vs. Zaltrap               | > 0,9999 |  |
| Control vs. AMG386                | > 0,9999 |  |
| Control vs. AMG386+Zaltrap        | > 0,9999 |  |
| Zaltrap vs. AMG386                | > 0,9999 |  |
| Zaltrap vs. AMG386+Zaltrap        | > 0,9999 |  |
| AMG386 vs. AMG386+Zaltrap         | > 0,9999 |  |
|                                   |          |  |
| day 12                            |          |  |
| Control vs. Zaltrap               | 0,9366   |  |
| Control vs. AMG386                | 0,984    |  |
| Control vs. AMG386+Zaltrap        | 0,9286   |  |
| Zaltrap vs. AMG386                | 0,9978   |  |
| Zaltrap vs. AMG386+Zaltrap        | > 0,9999 |  |
| AMG386 vs. AMG386+Zaltrap         | 0,9969   |  |
|                                   |          |  |
| day 19                            |          |  |
| Control vs. Zaltrap               | < 0,0001 |  |
| Control vs. AMG386                | 0,003    |  |
| Control vs. AMG386+Zaltrap        | < 0,0001 |  |
| Zaltrap vs. AMG386                | 0,6217   |  |
| Zaltrap vs. AMG386+Zaltrap        | 0,9974   |  |
| AMG386 vs. AMG386+Zaltrap         | 0,7294   |  |
|                                   |          |  |
| <b>Expanded View Figure 3 C</b>   |          |  |
| one-way ANOVA                     |          |  |
| Control vs. AMG386                | 0,244    |  |
| Control vs. Afibercept            | 0,5311   |  |
| Control vs. Afibercept+ AMG386    | 0,0039   |  |
| AMG386 vs. Afibercept             | 0,9378   |  |
| AMG386 vs. Afibercept+ AMG386     | 0,2402   |  |
| Afibercept vs. Afibercept+ AMG386 | 0,0787   |  |
